# Supplementary material for: Tree mode of death and mortality risk factors across Amazon forests
Source: PubMed Central journal article supplement (PMC7652827; doi:10.1038/s41467-020-18996-3), 2020-11-09
Supplement: 41467_2020_18996_MOESM1_ESM.pdf [file 41467_2020_18996_MOESM1_ESM.pdf]

## **Supplementary information**

### **Mode of death and mortality risk factors in Amazon trees**

**Esquivel-Muelbert *et al.***

**Supplementary tables****Table S1 Percentage of different mode of death for different Amazonian regions.** The 95% confidence intervals are shown in brackets.

|                       | Standing   | Broken/uprooted | n plots | n trees |
|-----------------------|------------|-----------------|---------|---------|
| All Amazon            | 48 (45-52) | 51 (48-54)      | 125     | 13862   |
| Northern Amazonia     | 51 (42-59) | 49 (41-57)      | 18      | 3049    |
| East Central Amazonia | 61 (58-86) | 39 (14-43)      | 10      | 183     |
| Western Amazonia      | 44 (28-47) | 55 (52-71)      | 76      | 8482    |
| Southern Amazonia     | 55 (49-72) | 44 (28-51)      | 21      | 2148    |

**Table S2 Number and proportion of trees and taxa with missing traits at species, genus and family levels within our dataset.**

|                           |       | species     | genus       | family    |
|---------------------------|-------|-------------|-------------|-----------|
| Mean growth rate          | trees | 19037 (16%) | 7819 (7%)   | 3722 (3%) |
|                           | taxa  | 2579 (69%)  | 266 (40%)   | 30 (26%)  |
| Maximum size              | trees | 16268 (14%) | 7238 (6%)   | 3663 (3%) |
|                           | taxa  | 2320 (62%)  | 215 (32%)   | 25 (22%)  |
| Water deficit affiliation | trees | 51798 (44%) | 11502 (10%) | 3878 (3%) |
|                           | taxa  | 2277 (61%)  | 191 (29%)   | 20 (17%)  |
| Wood density              | trees | 51025 (44%) | 9158 (8%)   | 3630 (3%) |
|                           | taxa  | 2465 (66%)  | 172 (26%)   | 9 (8%)    |

**Table S3 Variance inflation factor (VIF) of each of the risk factors included in the models of tree mortality in Amazonia.**

|         | Risk factors   | All Amazonia | Northern Amazonia | East-Central Amazonia | Western Amazonia | Southern Amazonia |
|---------|----------------|--------------|-------------------|-----------------------|------------------|-------------------|
| Stem    | D              | 1.3          | 1.3               | 1.3                   | 1.4              | 1.4               |
|         | D <sup>2</sup> | 1.1          | 1.1               | 1.0                   | 1.1              | 1.0               |
|         | rel. growth    | 1.1          | 1.1               | 1.1                   | 1.1              | 1.1               |
|         | max D          | 1.5          | 1.6               | 1.6                   | 1.4              | 1.4               |
| Species | mean growth    | 1.7          | 1.8               | 1.8                   | 1.7              | 1.6               |
|         | WD             | 1.3          | 1.4               | 1.5                   | 1.3              | 1.4               |
|         | WDA            | 1.0          | 1.0               | 1.0                   | 1.0              | 1.1               |

**Table S4 Comparison of survival models for standing and broken/uprooted dead trees across Amazonian inventory plots.** Models representing the probability of a tree dying standing or being found broken or uprooted, compared using  $\Delta$ AIC. This analysis was performed using information from 68,593 trees and 11,980 deaths (3,639 standing and 5,409 broken or uprooted) across 116 plots.

| Model description                          | Standing | Broken /uprooted |
|--------------------------------------------|----------|------------------|
| excluding WDA                              | 0        | 0                |
| full model                                 | 2        | 2                |
| excluding D <sup>2</sup>                   | 23       | 35               |
| excluding WD                               | 25       | 15               |
| excluding (D + D <sup>2</sup> )            | 38       | 46               |
| excluding rel. growth                      | 160      | 19               |
| excluding max D                            | 176      | 306              |
| excluding individual-level characteristics | 202      | 490              |
| excluding mean growth                      | 383      | 2                |
| excluding species traits                   | 624      | 706              |

**Table S5 Risk factors of the best models describing broken/uprooted and standing dead Amazonian trees.** Coefficients and standard error, in brackets, and  $\chi^2$  for each risk factor of the best models following model selection (Table S3.1). Coefficients that significantly differ from zero considering  $\alpha = 0.05$  are shown in bold.

| Risk factors   | Standing                                       |          | Broken/uprooted                                |          |
|----------------|------------------------------------------------|----------|------------------------------------------------|----------|
|                | Coefficients                                   | $\chi^2$ | Coefficients                                   | $\chi^2$ |
| D              | <b>-22(5)</b>                                  | 20       | <b>-16(4)</b>                                  | 15       |
| D <sup>2</sup> | <b>19(3)</b>                                   | 37       | <b>19(3)</b>                                   | 56       |
| relGR          | <b>-0.17(0.01)</b>                             | 135      | <b>-0.04(0.01)</b>                             | 17       |
| maxD           | <b>-2 x10<sup>-3</sup>(1 x10<sup>-4</sup>)</b> | 159      | <b>-2 x10<sup>-3</sup>(1 x10<sup>-4</sup>)</b> | 275      |
| mean growth    | <b>0.2(0.01)</b>                               | 475      | <b>0.2(0.01)</b>                               | 511      |
| WD             | <b>-0.7(0.1)</b>                               | 26       | <b>-0.4(0.1)</b>                               | 15       |

Supplementary figures

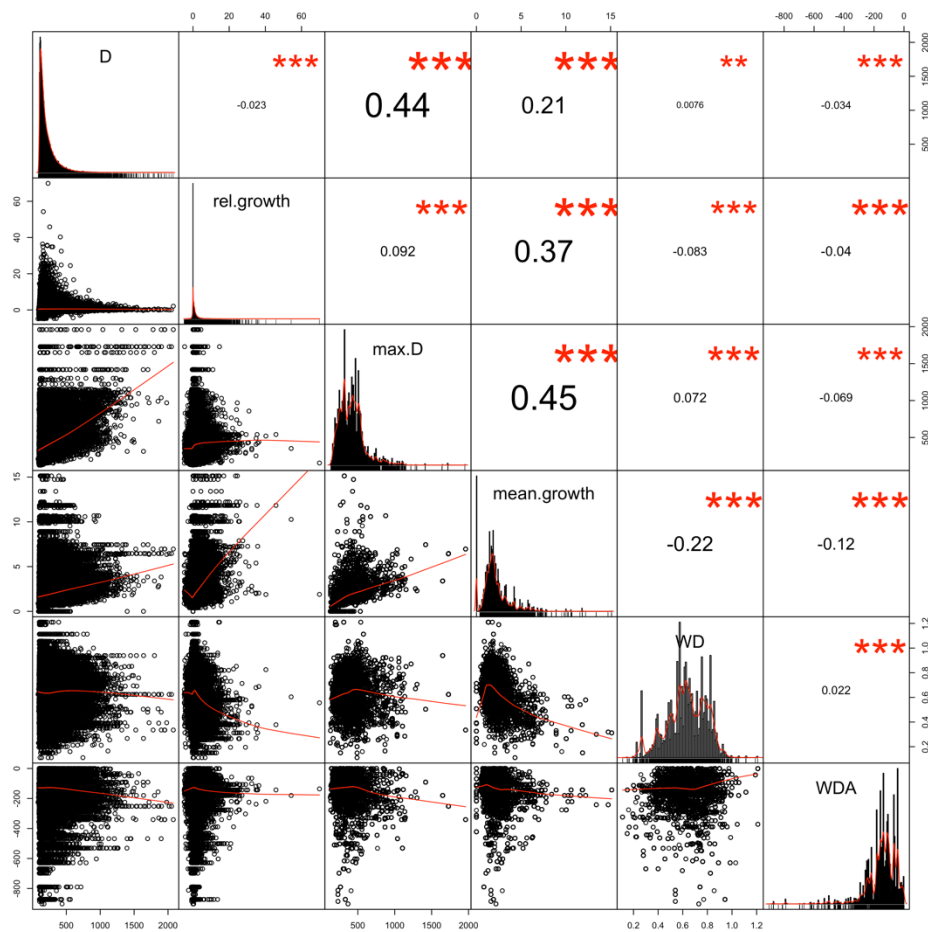

**Figure S1 Relationship between predictor variables used in the Cox proportional hazard model.** Here we show characteristics of individual trees: size, represented by tree diameter (D) and relative stem diameter growth rates (rel. growth); and species traits: maximum stem diameter size (max D), mean stem diameter growth rate (mean growth), wood density (WD) and drought tolerance represented as water deficit affiliation<sup>1</sup> (WDA). The Kendall  $\tau$  coefficient of correlation is shown in the top-right panels, font size reflects the value of the correlations. Source data are provided as a Source Data file.

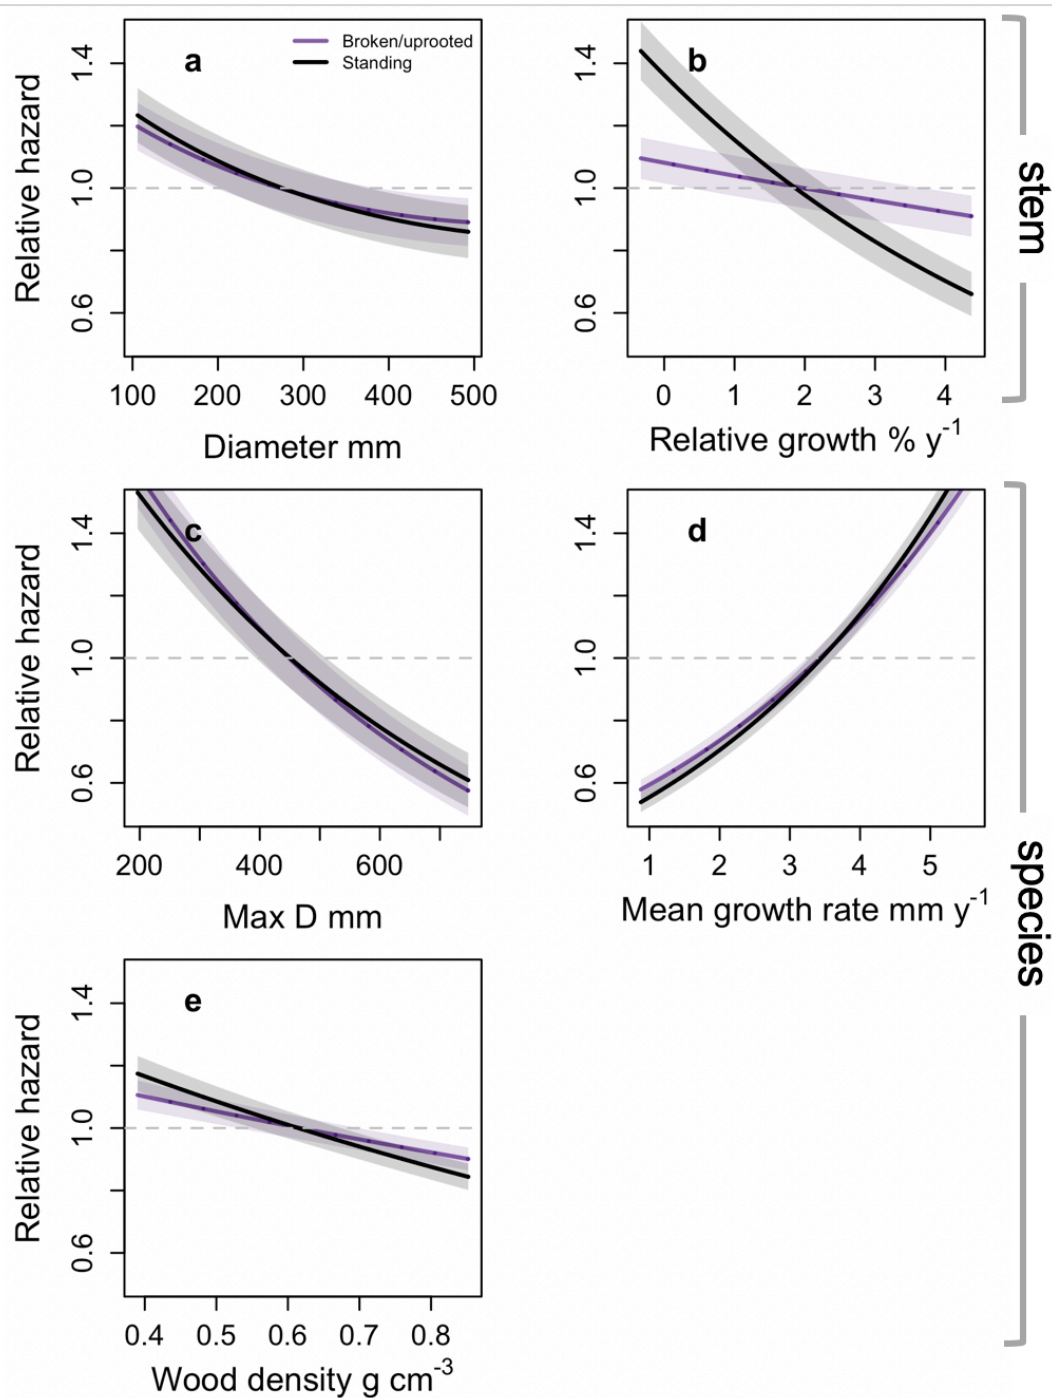

**Figure S2 Risk factors associated with death by breakage/uprooting (in purple) and standing death (black) for Amazonian trees.** Cox proportional hazard model outputs for the risk factors associated with characteristics of individual trees (**a** size and **b** growth rates) and species traits (**c** maximum size, **d** mean growth rate and **e** wood density). Shaded area represents the standard error for each coefficient. This analysis was performed using information from 68,593 trees and 11,980 deaths (3,639 standing and 5,409 broken or uprooted) across 116 plots. Source data are provided as a Source Data file.

## Supplementary References

- 1 Esquivel-Muelbert, A. *et al.* Seasonal drought limits tree species across the Neotropics. *Ecography* **40**, 618-629, doi:10.1111/ecog.01904 (2017).
